# Supplementary material
Source: Springer Nature journal article supplement (https://www.springermedizin.de/resource/supplementary/12913_2013_3463_MOESM1_ESM.pdf/9532886)
Supplement: MOESM1 [file 9532886]

# Ensuring Availability of Quality Generic and Innovative Products

- Monitoring product quality
- Prequalifying suppliers, products
- Negotiating prices, quality, volume, supply chain security
- Promoting fair competition
- Engaging in risk sharing agreements
- Establishing patient assistance programs

# Encouraging Appropriate Use

- Implementing & updating standard treatment guidelines (STG)
- Matching essential medicines and reimbursements lists to STG
- Assessing provider performance
- Managing care comprehensively
- Implementing and monitoring policies to encourage clinically appropriate and cost-effective use

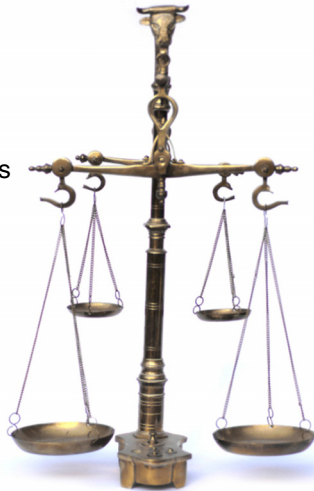

# Improving Equitable Access

- Understanding socioeconomic and geographic disease and utilization profiles
- Assessing household care seeking and barriers to care
- Expanding provider networks
- Targeting policies and programs to improve access for vulnerable populations

# Keeping Costs Affordable

- Monitoring routine medicines expenditures by therapeutic area
- Evaluating health technologies, budget impact drivers
- Assessing household medicines expenditure burden
- Implementing and monitoring policies and programs to reduce waste, inappropriate use
